# Supplementary material for: Differential Clinical Outcome of Dengue Infection among Patients with and without HIV Infection: A Matched Case–Control Study
Source: PubMed Central journal article supplement (PMC4458819; doi:10.4269/ajtmh.15-0031), 2015-06-03
Supplement: SD4.pdf [file SD4.pdf]

SUPPLEMENTAL TABLE 1

Demographic characteristics and preexisting conditions of dengue patients with and without HIV infection

| Variables                                     | DENV-HIV cases<br>(N = 10) | %  | DENV controls<br>(N = 40) | %    | COR   | P value | 95% CI     |
|-----------------------------------------------|----------------------------|----|---------------------------|------|-------|---------|------------|
| Median age* (IQR)                             | 47 (39–58)                 | –  | 44 (38–55)                | –    | 1.19  | 0.136   | 0.95–1.50  |
| Age groups                                    |                            |    |                           |      |       |         |            |
| 30–39                                         | 3                          | 30 | 16                        | 40   | –     | –       | –          |
| 40–49                                         | 3                          | 30 | 6                         | 15   | –     | –       | –          |
| 50–59                                         | 2                          | 20 | 13                        | 32.5 | –     | –       | –          |
| ≥ 60                                          | 2                          | 20 | 5                         | 12.5 | –     | –       | –          |
| Gender*                                       |                            |    |                           |      |       |         |            |
| Female                                        | 1                          | 10 | 4                         | 10   | –     | –       | –          |
| Laboratory diagnosis*                         |                            |    |                           |      |       |         |            |
| PCR+                                          | 3                          | 30 | 12                        | 30   | –     | –       | –          |
| Serology+                                     | 7                          | 70 | 28                        | 70   | –     | –       | –          |
| IgG                                           |                            |    |                           |      |       |         |            |
| IgG+                                          | 9                          | 90 | 34                        | 85   | 1.72  | 0.657   | 0.16–18.75 |
| Year of dengue infection*                     |                            |    |                           |      |       |         |            |
| 2005–2006                                     | 6                          | 60 | 24                        | 60   | –     | –       | –          |
| 2007–2008                                     | 4                          | 40 | 16                        | 40   | –     | –       | –          |
| Patient type*                                 |                            |    |                           |      |       |         |            |
| Inpatient                                     | 9                          | 90 | 36                        | 90   | –     | –       | –          |
| Outpatient                                    | 1                          | 10 | 4                         | 10   | –     | –       | –          |
| Diabetes mellitus                             |                            |    |                           |      |       |         |            |
| Yes                                           | 1                          | 10 | 3                         | 7.5  | 1.33  | 0.803   | 0.14–12.82 |
| Hypertension                                  |                            |    |                           |      |       |         |            |
| Yes                                           | 1                          | 10 | 8                         | 20   | 0.428 | 0.46    | 0.045–4.05 |
| Hyperlipidemia                                |                            |    |                           |      |       |         |            |
| Yes                                           | 0                          | 0  | 4                         | 10   | –     | –       | –          |
| Asthma                                        |                            |    |                           |      |       |         |            |
| Yes                                           | 1                          | 10 | 0                         | 0    | –     | –       | –          |
| Cardiac disorder                              |                            |    |                           |      |       |         |            |
| Yes                                           | 1                          | 10 | 1                         | 2.5  | –     | –       | –          |
| Lung disorder                                 |                            |    |                           |      |       |         |            |
| Yes                                           | 4                          | 40 | 0                         | 0    | –     | –       | –          |
| Liver disorder                                |                            |    |                           |      |       |         |            |
| Yes                                           | 0                          | 0  | 1                         | 2.5  | –     | –       | –          |
| Renal disorder                                |                            |    |                           |      |       |         |            |
| Yes                                           | 2                          | 20 | 2                         | 5    | 4     | 0.166   | 0.56–28.40 |
| Median HIV months prior to dengue (IQR)       | 36.5 (16–52.75)            |    | NA                        | –    | –     | –       | –          |
| Median HIV viral load (IQR)                   | 50 (50–251)                |    | NA                        | –    | –     | –       | –          |
| Median CD4 count 6 months before dengue (IQR) | 123 (79–303)               |    | NA                        | –    | –     | –       | –          |
| Median CD4 count 6 months after dengue (IQR)  | 144 (74.5–251)             |    | NA                        | –    | –     | –       | –          |
| Median lowest CD4 count recorded (IQR)        | 45 (37–75.5)               |    | NA                        | –    | –     | –       | –          |
| AIDS                                          | 7                          | 70 | 0                         | 0    | –     | –       | –          |

AIDS = acquired immunodeficiency syndrome; CI = confidence interval; COR = conditional odds ratio; DENV = dengue virus; HIV = human immunodeficiency virus; IQR = interquartile range.  
\*Matched variables.

SUPPLEMENTAL TABLE 2  
Clinical characteristics of dengue patients with and without HIV infection at presentation

| Variables                                | DENV-HIV cases<br>(N = 10) | %  | DENV controls<br>(N = 40) | %    | COR  | P value | 95% CI     | ACOR  | P value | 95% CI     |
|------------------------------------------|----------------------------|----|---------------------------|------|------|---------|------------|-------|---------|------------|
| Hemorrhagic manifestation                |                            |    |                           |      |      |         |            |       |         |            |
| Yes                                      | 1                          | 10 | 27                        | 67.5 | 0.08 | 0.051   | 0.01–1.10  | 0.07  | 0.09    | 0.01–1.48  |
| Any rash                                 |                            |    |                           |      |      |         |            |       |         |            |
| Yes                                      | 1                          | 10 | 19                        | 47.5 | 0.12 | 0.053   | 0.01–1.03  | 0.11  | 0.100   | 0.01–1.54  |
| Leucopenia                               |                            |    |                           |      |      |         |            |       |         |            |
| Yes                                      | 5                          | 50 | 30                        | 75   | 0.33 | 0.125   | 0.80–1.36  | 0.64  | 0.574   | 0.13–3.05  |
| Nausea/vomiting                          |                            |    |                           |      |      |         |            |       |         |            |
| Yes                                      | 4                          | 40 | 23                        | 57.5 | 0.47 | 0.320   | 0.11–2.08  | 0.41  | 0.293   | 0.80–2.15  |
| Aches and pains                          |                            |    |                           |      |      |         |            |       |         |            |
| Yes                                      | 5                          | 50 | 32                        | 80   | 0.26 | 0.073   | 0.06–1.14  | 0.34  | 0.18    | 0.07–1.64  |
| Any warning sign                         |                            |    |                           |      |      |         |            |       |         |            |
| Yes                                      | 7                          | 70 | 25                        | 62.5 | 1.40 | 0.66    | 0.31–6.30  | 1     | 1       | 0.20–5.08  |
| Abdominal pain/tenderness                |                            |    |                           |      |      |         |            |       |         |            |
| Yes                                      | 2                          | 20 | 7                         | 17.5 | 1.16 | 0.86    | 0.22–6.23  | 1.12  | 0.92    | 0.11–11.21 |
| Persistent vomiting                      |                            |    |                           |      |      |         |            |       |         |            |
| Yes                                      | 0                          | 0  | 0                         | 0    | –    | –       | –          | –     | –       | –          |
| Clinical fluid accumulation              |                            |    |                           |      |      |         |            |       |         |            |
| Yes                                      | 0                          | 0  | 0                         | 0    | –    | –       | –          | –     | –       | –          |
| Mucosal bleed                            |                            |    |                           |      |      |         |            |       |         |            |
| Yes                                      | 1                          | 10 | 10                        | 25   | 0.33 | 0.323   | 0.04–2.96  | 0.313 | 0.30    | 0.035–2.84 |
| Lethargy                                 |                            |    |                           |      |      |         |            |       |         |            |
| Yes                                      | 4                          | 40 | 9                         | 22.5 | 2.24 | 0.278   | 0.52–9.57  | 2.4   | 0.28    | 0.50–11.67 |
| Hepatomegaly                             |                            |    |                           |      |      |         |            |       |         |            |
| Yes                                      | 1                          | 10 | 4                         | 10   | 1    | 1       | 0.07–13.72 | 1.74  | 0.80    | 0.03–133.5 |
| Hematocrit rise with rapid platelet drop |                            |    |                           |      |      |         |            |       |         |            |
| Yes                                      | 1                          | 10 | 5                         | 12.5 | 0.77 | 0.824   | 0.08–7.76  | 1.41  | 0.792   | 0.11–18.40 |
| Hypoproteinemia                          |                            |    |                           |      |      |         |            |       |         |            |
| Yes                                      | 3                          | 30 | 14                        | 35   | 0.79 | 0.763   | 0.17–3.62  | 0.95  | 0.954   | 0.16–5.54  |
| Thrombocytopenia                         |                            |    |                           |      |      |         |            |       |         |            |
| Yes                                      | 7                          | 70 | 35                        | 87.5 | 0.35 | 0.204   | 0.07–1.78  | 0.49  | 0.453   | 0.08–3.17  |
| Tachycardia                              |                            |    |                           |      |      |         |            |       |         |            |
| Yes                                      | 3                          | 30 | 8                         | 20   | 1.89 | 0.47    | 0.34–10.65 | 1.32  | 0.801   | 0.15–11.58 |
| Hypotension                              |                            |    |                           |      |      |         |            |       |         |            |
| Yes                                      | 2                          | 20 | 5                         | 12.5 | 1.77 | 0.545   | 0.28–11.12 | 1.20  | 0.868   | 0.11–13.95 |
| Mechanical ventilation                   |                            |    |                           |      |      |         |            |       |         |            |
| Yes                                      | 0                          | 0  | 0                         | 0    | –    | –       | –          | –     | –       | –          |
| Respiratory distress                     |                            |    |                           |      |      |         |            |       |         |            |
| Yes                                      | 0                          | 0  | 0                         | 0    | –    | –       | –          | –     | –       | –          |
| Severe bleeding                          |                            |    |                           |      |      |         |            |       |         |            |
| Yes                                      | 0                          | 0  | 2                         | 5    | –    | –       | –          | –     | –       | –          |
| Severe organ involvement                 |                            |    |                           |      |      |         |            |       |         |            |
| Yes                                      | 0                          | 0  | 2                         | 5    | –    | –       | –          | –     | –       | –          |

ACOR = adjusted conditional odds ratio; CI = confidence interval; COR = conditional odds ratio; DENV = dengue virus; HIV = human immunodeficiency virus.  
ACOR adjusted by days post fever onset at first dengue presentation.

SUPPLEMENTAL TABLE 3  
Clinical characteristics of dengue patients with and without HIV infection during hospitalization

| Variables                 | DENV-HIV cases<br>(N = 10) | %    | DENV controls<br>(N = 40) | %    | COR  | P value | 95% CI     | ACOR | P value | 95% CI     |
|---------------------------|----------------------------|------|---------------------------|------|------|---------|------------|------|---------|------------|
| Leucopenia                |                            |      |                           |      |      |         |            |      |         |            |
| Yes                       | 7                          | 70   | 33                        | 82.5 | 0.50 | 0.384   | 0.10–2.40  | 0.94 | 0.940   | 0.17–5.24  |
| Nausea/vomiting           |                            |      |                           |      |      |         |            |      |         |            |
| Yes                       | 5                          | 50   | 26                        | 65   | 0.53 | 0.381   | 0.13–2.20  | 0.37 | 0.214   | 0.08–1.79  |
| Aches and pains           |                            |      |                           |      |      |         |            |      |         |            |
| Yes                       | 8                          | 80   | 34                        | 85   | 0.72 | 0.707   | 0.13–4.08  | 0.53 | 0.546   | 0.07–4.23  |
| Any warning sign          |                            |      |                           |      |      |         |            |      |         |            |
| Yes                       | 8                          | 80   | 29                        | 72.5 | 1.65 | 0.597   | 0.26–10.51 | 1.20 | 0.852   | 0.18–7.91  |
| Abdominal pain/tenderness |                            |      |                           |      |      |         |            |      |         |            |
| Yes                       | 4                          | 40   | 12                        | 30   | 1.56 | 0.549   | 0.37–6.66  | 1.09 | 0.933   | 0.15–7.68  |
| Persistent vomiting       |                            |      |                           |      |      |         |            |      |         |            |
| Yes                       | 0                          | 0    | 3                         | 7.5  | –    | –       | –          | –    | –       | –          |
| Lethargy                  |                            |      |                           |      |      |         |            |      |         |            |
| Yes                       | 5                          | 50   | 9                         | 22.5 | 3.42 | 0.106   | 0.77–15.18 | 2.49 | 0.254   | 0.52–11.89 |
| Mucosal bleed             |                            |      |                           |      |      |         |            |      |         |            |
| Yes                       | 1                          | 10   | 16                        | 40   | 0.17 | 0.110   | 0.02–1.48  | 0.18 | 0.133   | 0.02–1.69  |
| Hypoproteinemia           |                            |      |                           |      |      |         |            |      |         |            |
| Yes                       | 5                          | 55.6 | 18                        | 54.6 | 0.73 | 0.689   | 0.15–3.44  | 0.71 | 0.70    | 0.13–3.91  |
| Thrombocytopenia          |                            |      |                           |      |      |         |            |      |         |            |
| Yes                       | 10                         | 100  | 40                        | 100  | –    | –       | –          | –    | –       | –          |
| Tachycardia               |                            |      |                           |      |      |         |            |      |         |            |
| Yes                       | 7                          | 70   | 8                         | 20   | –    | –       | –          | –    | –       | –          |
| Respiratory distress      |                            |      |                           |      |      |         |            |      |         |            |
| Yes                       | 1                          | 10   | 2                         | 5    | 2    | 0.571   | 0.18–22.06 | 3.83 | 0.325   | 0.26–55.77 |
| Mechanical ventilation    |                            |      |                           |      |      |         |            |      |         |            |
| Yes                       | 0                          | 0    | 0                         | 0    | –    | –       | –          | –    | –       | –          |

ACOR = adjusted conditional odds ratio; CI = confidence interval; COR = conditional odds ratio; DENV = dengue virus; HIV = human immunodeficiency virus.  
ACOR adjusted by days post fever onset at first dengue presentation.

SUPPLEMENTAL TABLE 4  
Laboratory characteristics of dengue patients with and without HIV infection at presentation

| Variable (IQR)                | DENV-HIV cases<br>(N = 10) | DENV controls<br>(N = 40) | COR  | P value | 95% CI    | ACOR | P value | 95% CI    |
|-------------------------------|----------------------------|---------------------------|------|---------|-----------|------|---------|-----------|
| Temperature (°C)              | 37.7 (37.4–38.4)           | 37.8 (37–38.6)            | 0.95 | 0.919   | 0.38–2.37 | 0.85 | 0.766   | 0.30–2.42 |
| Respiratory rate/minute       | 19 (18–20)                 | 20 (18–20)                | 0.49 | 0.128   | 0.20–1.23 | 0.22 | 0.215   | 0.02–2.38 |
| Oxygen saturation (%)         | 99 (98–99.5)               | 97.5 (96–98.3)            | 1.97 | 0.281   | 0.57–6.76 | –    | –       | –         |
| Proportion of lymphocytes (%) | 17.2 (8.4–29.3)            | 21.6 (17.4–28.7)          | 0.96 | 0.338   | 0.87–1.05 | 1.01 | 0.892   | 0.91–1.12 |
| Proportion of basophils (%)   | 0.3 (0.2–0.5)              | 0.1 (0–0.5)               | 1.86 | 0.186   | 0.74–4.68 | 1.83 | 0.198   | 0.73–4.62 |
| Platelet (10 <sup>9</sup> /L) | 71.5 (44.8–111)            | 60 (33–73.5)              | 1.01 | 0.093   | 0.99–1.03 | 1.02 | 0.211   | 0.99–1.04 |
| Serum urea (mmol/L)           | 5.9 (3.7–11.6)             | 3.7 (2.7–4.7)             | 1.50 | 0.077   | 0.96–2.34 | 1.38 | 0.321   | 0.73–2.58 |
| Serum creatinine (mmol/L)     | 98 (97–101.5)              | 100.5 (98–105)            | 0.83 | 0.193   | 0.63–1.10 | 0.80 | 0.185   | 0.58–1.11 |
| Serum bilirubin               | 13 (9–16)                  | 13 (10.3–15.8)            | 1.05 | 0.409   | 0.93–1.18 | 1.04 | 0.597   | 0.89–1.22 |
| Serum AST (U/L)               | 35 (22–158)                | 89 (54–189.5)             | 1    | 0.663   | 0.99–1.00 | 1    | 0.965   | 0.99–1.00 |
| Serum ALT (U/L)               | 42 (20–127)                | 60 (42–99.5)              | 0.99 | 0.620   | 0.99–1.01 | 1    | 0.949   | 0.99–1.01 |
| Serum protein (g/L)           | 63.5 (60.8–69.3)           | 63 (59–70)                | 0.97 | 0.325   | 0.91–1.03 | 0.98 | 0.466   | 0.91–1.04 |
| Serum albumin (g/L)           | 33 (27–35)                 | 36 (35–39)                | 0.87 | 0.118   | 0.73–1.04 | 0.93 | 0.461   | 0.76–1.13 |

ACOR = adjusted conditional odds ratio; ALT = alanine aminotransferase; AST = aspartate aminotransferase; CI = confidence interval; COR = conditional odds ratio; DENV = dengue virus; HIV = human immunodeficiency virus; IQR = interquartile range.  
ACOR adjusted by days post fever onset at first dengue presentation.

SUPPLEMENTAL TABLE 5

## Laboratory characteristics of DENV patients with and without HIV infection during hospitalization

| Variables (IQR)                       | DENV-HIV cases<br>(N = 10) | DENV controls<br>(N = 40) | COR  | P value | 95% CI    | ACOR | P value | 95% CI    |
|---------------------------------------|----------------------------|---------------------------|------|---------|-----------|------|---------|-----------|
| Respiratory rate/minute               | 18 (18–20)                 | 18 (16–18)                | 1.25 | 0.256   | 0.85–1.86 | 1.25 | 0.318   | 0.80–1.95 |
| Oxygen saturation (%)                 | 95 (94–96)                 | 97.5 (96–98)              | 0.66 | 0.054   | 0.43–1.01 | 0.72 | 0.133   | 0.46–1.11 |
| White cell count (10 <sup>9</sup> /L) | 3 (1.7–4.0)                | 2.3 (1.9–3)               | 1.31 | 0.224   | 0.85–2.01 | 1.13 | 0.624   | 0.69–1.85 |
| Proportion of lymphocytes (%)         | 33.8 (20.9–44.2)           | 38.8 (31.6–49.4)          | 0.95 | 0.112   | 0.90–1.01 | 0.98 | 0.441   | 0.92–1.04 |
| Proportion of monocytes (%)           | 14 (10.1–16)               | 17.9 (14–24.8)            | 0.86 | 0.051   | 0.73–1.00 | 0.89 | 0.191   | 0.75–1.06 |
| Proportion of basophils (%)           | 0.7 (0.5–1.7)              | 1.35 (1–2.6)              | 0.65 | 0.159   | 0.36–1.18 | 0.68 | 0.225   | 0.37–1.26 |
| Platelet (10 <sup>9</sup> /L)         | 33 (18–73.3)               | 19.5 (10–45.5)            | 1.03 | 0.080   | 0.99–1.06 | 1.02 | 0.251   | 0.98–1.07 |
| Serum urea (mmol/L)                   | 5.9 (3.7–12)               | 3.8 (2.7–4.8)             | 1.09 | 0.117   | 0.98–1.22 | 1.06 | 0.330   | 0.94–1.20 |
| Serum creatinine (μmol/L)             | 103 (100–110)              | 103 (98.3–105.8)          | 1.03 | 0.691   | 0.88–1.22 | 1.03 | 0.716   | 0.86–1.24 |
| Serum bilirubin (μmol/L)              | 13 (9–16)                  | 14 (11–20)                | 1.05 | 0.377   | 0.94–1.18 | 1.02 | 0.783   | 0.89–1.17 |
| Serum AST (U/L)                       | 58.5 (25.3–135)            | 118.5 (67–223.5)          | 1    | 0.297   | 0.99–1.00 | 1    | 0.39    | 0.99–1.00 |
| Serum ALT (U/L)                       | 51.5 (21.3–119.8)          | 71.5 (47.5–153.3)         | 0.99 | 0.304   | 0.98–1.01 | 0.99 | 0.333   | 0.98–1.01 |
| Serum protein (g/L)                   | 60 (46–69)                 | 62 (56–69)                | 0.95 | 0.175   | 0.87–1.03 | 0.96 | 0.339   | 0.88–1.04 |

ACOR = adjusted conditional odds ratio; ALT = alanine aminotransferase; AST = aspartate aminotransferase; CI = confidence interval; COR = conditional odds ratio; DENV = dengue virus; HIV = human immunodeficiency virus; IQR = interquartile range.

ACOR adjusted by days post fever onset at first dengue presentation.
